# Supplementary material
Source: Springer Nature journal article supplement (https://www.springermedizin.de/resource/supplementary/12885_2007_1186_MOESM1_ESM.pdf/9471348)

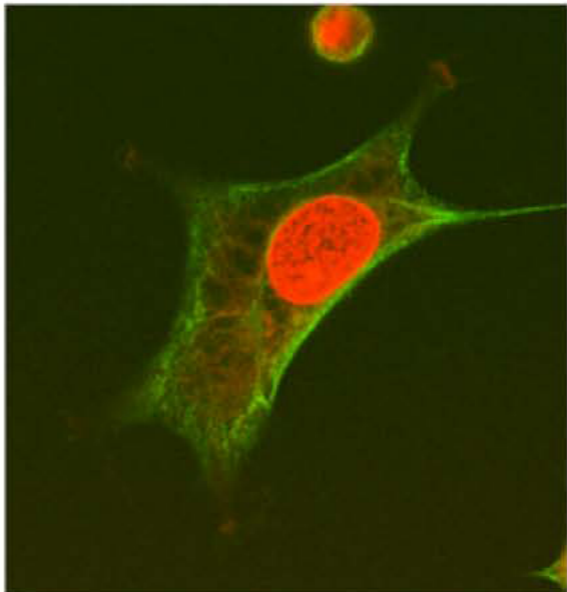

SK-BR-3

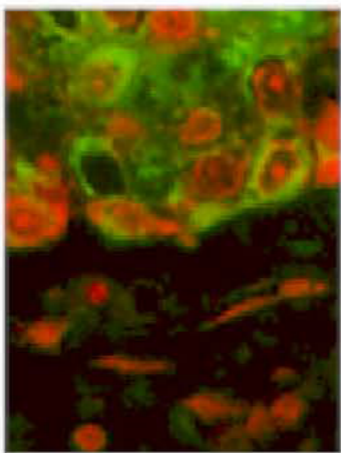

Breast cancer tissue

Supplement: MOESM1 [file 9471348]
